# Supplementary material
Source: MDPI journal article supplement (https://www.mdpi.com/2076-3298/10/2/23)
Supplement: s1 [file s1]

**Table S1:** Overview of all significant P-values across the experiments.

| Experiment_1           |                       |         | Experiment_2            |                         |         |
|------------------------|-----------------------|---------|-------------------------|-------------------------|---------|
| Treatment_1            | Treatment_2           | P-value | Treatment_1             | Treatment_2             | P-value |
| 10 g HS <sub>raw</sub> | Control               | <.0001* | Control                 | 2 g B27 <sub>raw</sub>  | 0.0157* |
| 10 g HS <sub>raw</sub> | 1 g HS <sub>raw</sub> | <.0001* | Control                 | 5 g B27 <sub>raw</sub>  | <.0001* |
| 10 g HS <sub>raw</sub> | 2 g HS <sub>raw</sub> | <.0001* | Control                 | 10 g B27 <sub>raw</sub> | <.0001* |
| 10 g HS <sub>raw</sub> | 5 g HS <sub>raw</sub> | <.0001* | 1 g B27 <sub>raw</sub>  | 2 g B27 <sub>raw</sub>  | 0.0026* |
|                        |                       |         | 1 g B27 <sub>raw</sub>  | 5 g B27 <sub>raw</sub>  | <.0001* |
|                        |                       |         | 2 g B27 <sub>raw</sub>  | 5 g B27 <sub>raw</sub>  | 0.0003* |
|                        |                       |         | 10 g B27 <sub>raw</sub> | 1 g B27 <sub>raw</sub>  | <.0001* |
|                        |                       |         | 10 g B27 <sub>raw</sub> | 2 g B27 <sub>raw</sub>  | 0.0049* |
|                        |                       |         | 5 g HS <sub>raw</sub>   | 5 g B27 <sub>raw</sub>  | <.0001* |
| Experiment_3           |                       |         | Experiment_4            |                         |         |
| Treatment_1            | Treatment_2           | P-value | Treatment_1             | Treatment_2             | P-value |
| 10 g HS <sub>raw</sub> | Control               | <.0001* | 10 g B27 <sub>raw</sub> | Control                 | <.0001* |
| 10 g HS <sub>raw</sub> | 10 g HS <sub>O2</sub> | 0.0001* | 10 g B27 <sub>raw</sub> | 10 g B27 <sub>O2</sub>  | 0.001*  |
